# Supplementary material for: Improving workflow control in radiotherapy using discrete-event simulation
Source: Springer Nature journal article supplement (doi:10.1186/s12911-019-0910-0), 2019-10-24
Supplement: MOESM1 [file 17306934]

**Additional file 1: List of care plans in the NKI (2017) and corresponding data used for model inputs**

| Care plan                        | Tumor site | # patients  | # acute     | # subacute   | # regular    | # patients with planned delay | Prob. P2 | P2 time (min) | P3 time (min) | P4 time (min) |
|----------------------------------|------------|-------------|-------------|--------------|--------------|-------------------------------|----------|---------------|---------------|---------------|
| Anus +/- inguinal lymph node     | Others     | 22          | 0           | 0            | 22           | 1                             | 0.05     | 60            | -             | 480           |
| Adrenal Stereotaxic              | Others     | 7           | 0           | 0            | 7            | 0                             | 0.00     | -             | -             | 420           |
| Bladder                          | Others     | 43          | 0           | 2            | 41           | 2                             | 0.02     | 60            | -             | 240           |
| Bladder (partial)                | Others     | 22          | 0           | 0            | 22           | 5                             | 0.00     | -             | -             | 240           |
| Chest wall                       | Chest wall | 45          | 0           | 0            | 45           | 20                            | 0.02     | 60            | -             | 120           |
| Chest wall+Axilla                | Chest wall | 114         | 0           | 0            | 114          | 57                            | 0.85     | 90            | -             | 240           |
| Chest wall+Axilla+Parasternal    | Chest wall | 15          | 1           | 1            | 13           | 7                             | 0.60     | 120           | -             | 240           |
| Chest wall+Parasternal           | Chest wall | 3           | 0           | 0            | 3            | 2                             | 0.33     | 60            | -             | 240           |
| Chest wall (bsu)                 | Chest wall | 2           | 0           | 1            | 1            | 1                             | 1.00     | 60            | -             | -             |
| Bone metastasis                  | Bone met.  | 1119        | 53          | 1006         | 60           | 32                            | 0.93     | 60            | -             | 300           |
| Bone metastasis Stereotaxic      | Bone met.  | 56          | 0           | 1            | 55           | 1                             | 0.14     | 60            | -             | 420           |
| Brachy Bladder                   | Others     | 15          | 0           | 0            | 15           | 0                             | 0.00     | -             | -             | -             |
| Brachy Cilinder                  | Others     | 21          | 0           | 0            | 21           | 0                             | 0.05     | 60            | -             | -             |
| Brachy Intrauterine              | Others     | 27          | 0           | 0            | 27           | 0                             | 0.00     | -             | -             | -             |
| Brachy IOBT                      | Others     | 1           | 0           | 0            | 1            | 0                             | 0.00     | -             | -             | -             |
| Brachy Oesophagus                | Others     | 1           | 0           | 0            | 1            | 0                             | 0.00     | -             | -             | -             |
| Brachy Prostate                  | Others     | 6           | 0           | 0            | 6            | 0                             | 0.00     | -             | -             | -             |
| Uterus                           | Others     | 43          | 0           | 2            | 41           | 4                             | 0.02     | 60            | -             | 360           |
| Endometrium                      | Others     | 17          | 0           | 0            | 17           | 1                             | 0.06     | 60            | -             | 360           |
| Neck (bsu)                       | Others     | 9           | 0           | 8            | 1            | 1                             | 1.00     | 60            | -             | -             |
| Brain 1 fraction                 | Brain      | 140         | 0           | 10           | 130          | 2                             | 0.14     | 60            | -             | 360           |
| Brain several fractions          | Brain      | 94          | 0           | 5            | 89           | 3                             | 0.09     | 60            | -             | 360           |
| Brain (whole)                    | Brain      | 166         | 2           | 134          | 30           | 8                             | 1.00     | 60            | -             | -             |
| Brain Electrons                  | Others     | 6           | 0           | 0            | 6            | 1                             | 0.17     | 60            | -             | 360           |
| Lymph node Stereotaxic           | Others     | 22          | 0           | 0            | 22           | 3                             | 0.00     | -             | -             | 300           |
| Head-and-neck                    | Head&neck  | 237         | 0           | 2            | 235          | 21                            | 0.00     | 60            | -             | 480           |
| Head-and-neck (palliative)       | Head&neck  | 4           | 0           | 0            | 4            | 1                             | 0.25     | 60            | -             | 480           |
| Larynx 2vs                       | Others     | 2           | 0           | 0            | 2            | 0                             | 0.00     | -             | -             | 480           |
| Liver                            | Others     | 34          | 0           | 1            | 33           | 1                             | 0.03     | 60            | -             | 600           |
| Lung (palliative)                | Lung       | 65          | 1           | 51           | 13           | 5                             | 0.42     | 60            | -             | 690           |
| Lung                             | Lung       | 283         | 1           | 8            | 274          | 15                            | 0.08     | 60            | -             | 690           |
| Lung (bsu)                       | Lung       | 50          | 0           | 46           | 4            | 2                             | 0.90     | 60            | -             | 690           |
| Lung Stereotaxic                 | Lung       | 239         | 0           | 2            | 237          | 11                            | 0.01     | 60            | -             | 420           |
| Lymphoma                         | Others     | 43          | 0           | 2            | 41           | 6                             | 0.07     | 60            | -             | 300           |
| Lymphoma (bsu)                   | Others     | 18          | 0           | 3            | 15           | 2                             | 0.78     | 60            | -             | 300           |
| Stomach                          | Breast     | 14          | 1           | 1            | 12           | 2                             | 0.21     | 60            | -             | 360           |
| Breast                           | Breast     | 777         | 0           | 7            | 770          | 276                           | 0.03     | 60            | 120           | 120           |
| Breast+Axilla                    | Breast     | 180         | 0           | 0            | 180          | 69                            | 0.63     | 90            | 240           | 240           |
| Breast+Axilla+Parasternal        | Breast     | 19          | 0           | 0            | 19           | 9                             | 0.53     | 120           | 240           | 240           |
| Breast+Parasternal               | Others     | 1           | 0           | 0            | 1            | 0                             | 1.00     | 60            | 120           | 120           |
| Esophagus                        | Others     | 78          | 1           | 5            | 72           | 9                             | 0.09     | 60            | -             | 360           |
| Esophagus (palliative)           | Others     | 22          | 1           | 18           | 3            | 1                             | 0.55     | 60            | -             | 360           |
| Axilla (virtual)                 | Others     | 5           | 0           | 4            | 1            | 0                             | 0.60     | 60            | -             | 300           |
| Orbit (eye socket)               | Others     | 1           | 0           | 1            | 0            | 0                             | 0.00     | -             | -             | 480           |
| Ovaries                          | Others     | 5           | 0           | 2            | 3            | 1                             | 0.00     | -             | -             | 360           |
| Others                           | Others     | 186         | 0           | 138          | 48           | 18                            | 0.07     | 60            | -             | 300           |
| Others (bsu)                     | Others     | 62          | 1           | 56           | 5            | 2                             | 0.87     | 60            | -             | 300           |
| PAO (+/- iliac single-sided)     | Others     | 1           | 0           | 0            | 1            | 0                             | 0.00     | -             | -             | 240           |
| Penis                            | Others     | 11          | 0           | 1            | 10           | 0                             | 0.00     | -             | -             | 480           |
| Prostate                         | Prostate   | 243         | 0           | 1            | 242          | 12                            | 0.01     | 60            | 150           | 150           |
| Prostate+Pelvic lymph nodes      | Prostate   | 61          | 0           | 0            | 61           | 8                             | 0.00     | -             | 420           | 420           |
| Prostatic bed                    | Prostate   | 36          | 0           | 0            | 36           | 2                             | 0.00     | -             | 300           | 300           |
| Prostatic bed+Pelvic lymph nodes | Prostate   | 25          | 0           | 0            | 25           | 5                             | 0.00     | -             | 420           | 420           |
| Rectum / Sigmoid                 | Others     | 88          | 0           | 4            | 84           | 6                             | 0.02     | 60            | 300           | 300           |
| Rectum 13 x 3 Gy                 | Others     | 6           | 0           | 5            | 1            | 0                             | 0.00     | -             | 300           | 300           |
| Rectum 5 x 5 Gy                  | Others     | 57          | 1           | 0            | 56           | 2                             | 0.00     | -             | 300           | 300           |
| Sarcoma abdominal/thoracic wall  | Others     | 13          | 0           | 0            | 13           | 4                             | 0.00     | -             | -             | 240           |
| Sarcoma extremity                | Others     | 31          | 0           | 4            | 27           | 2                             | 0.03     | 60            | -             | 480           |
| Sarcoma retroperitoneal          | Others     | 9           | 0           | 0            | 9            | 0                             | 0.00     | -             | -             | 240           |
| Spinal cord                      | Others     | 37          | 0           | 1            | 36           | 4                             | 0.16     | 60            | -             | 480           |
| Vagina                           | Others     | 5           | 0           | 0            | 5            | 1                             | 0.00     | -             | -             | 360           |
| Vulva +/- inguinal lymph nodes   | Others     | 9           | 0           | 0            | 9            | 2                             | 0.00     | -             | -             | 420           |
| <b>Total</b>                     |            | <b>4973</b> | <b>63</b>   | <b>1533</b>  | <b>3377</b>  | <b>650</b>                    |          |               |               |               |
| <b>% of patient population</b>   |            |             | <b>1.3%</b> | <b>30.8%</b> | <b>67.9%</b> | <b>13.1%</b>                  |          |               |               |               |
